# Supplementary material for: Phenolic Profiles of Leaves, Grapes and Wine of Grapevine Variety Vranac (Vitis vinifera L.) from Montenegro
Source: MDPI journal article supplement (doi:10.3390/foods9020138), 2020-01-28
Supplement: s1 [file s1]

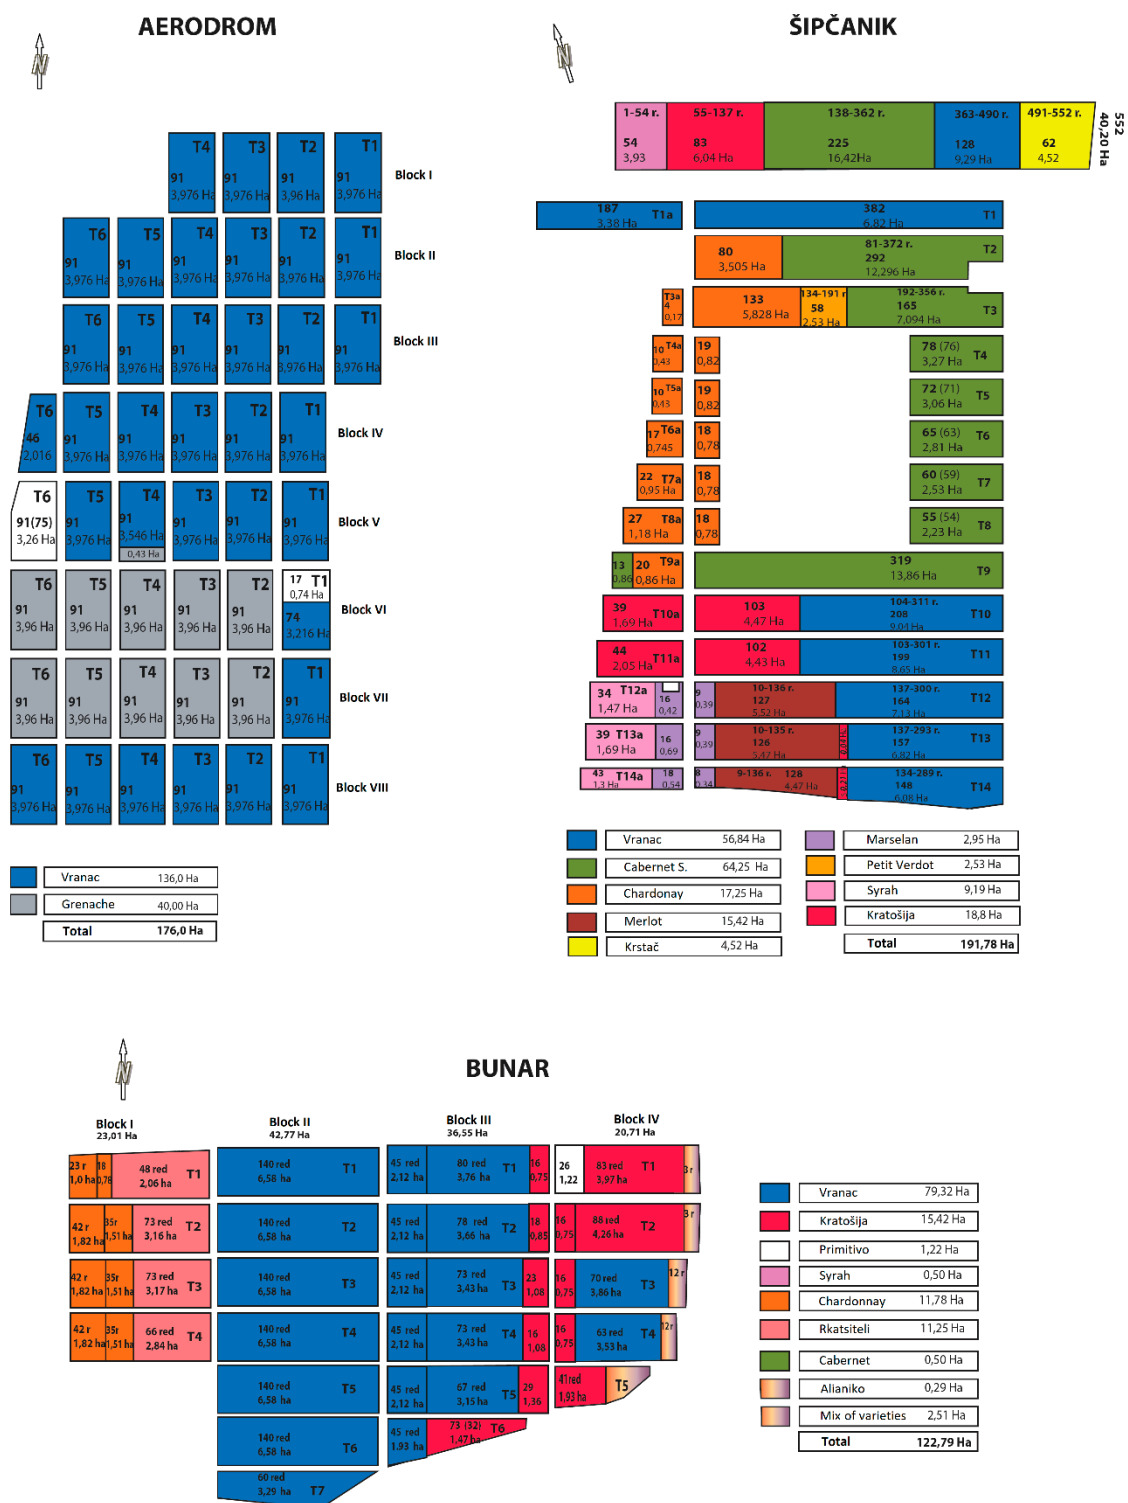

Figure S1. sketch of all three vineyards.
